# Supplementary material
Source: PubMed Central journal article supplement (PMC6020066)

**A**HEK-293T cells  
expressing: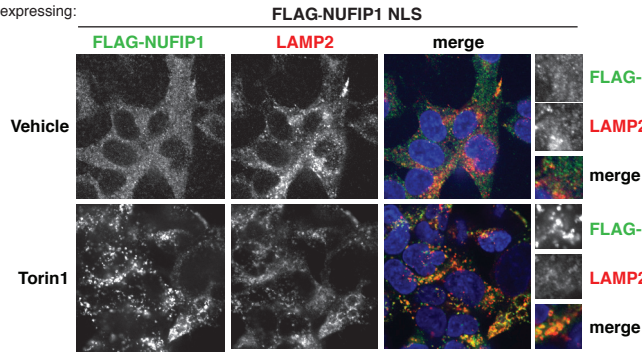**B**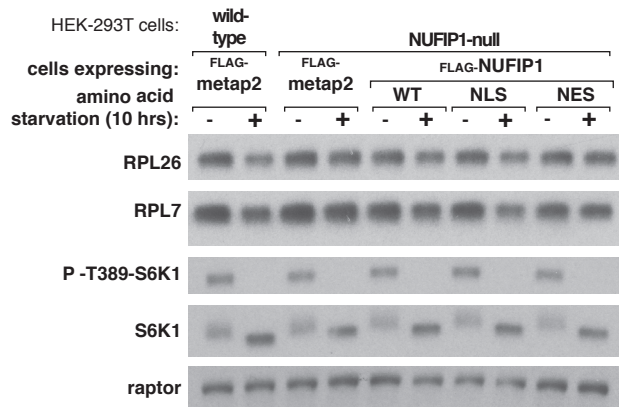**C**HEK-293T cells  
expressing: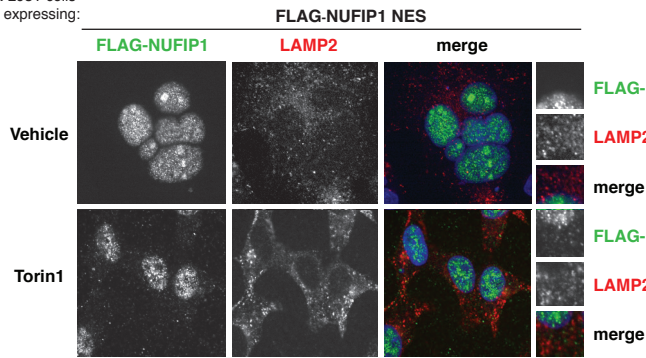**D**HEK-293T cells  
expressing: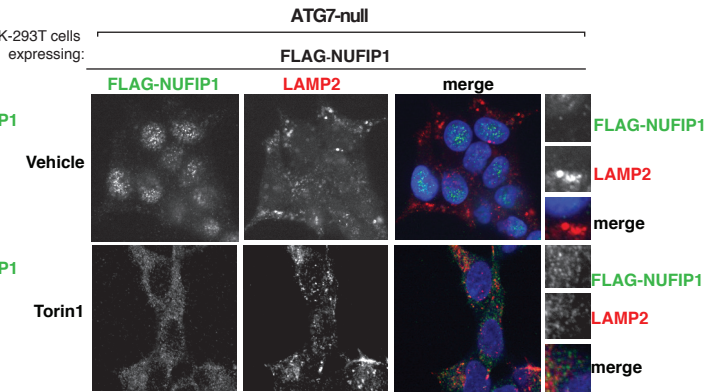**E**HEK-293T cells  
expressing: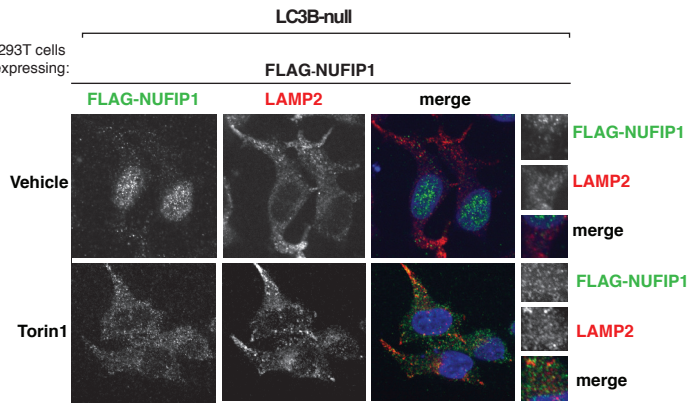

Supplement: NIHMS966573-supplement-Supp_Figure_7.pdf [file NIHMS966573-supplement-Supp_Figure_7.pdf]
