# Supplementary material
Source: PubMed Central journal article supplement (PMC6020066)

**A**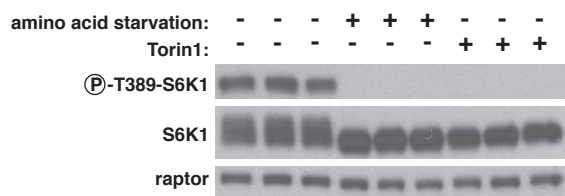**B**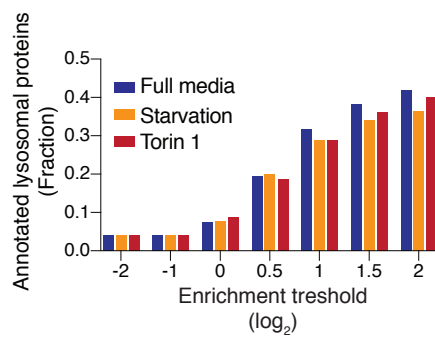

Supplement: NIHMS966573-supplement-Supp_Figure_1.pdf [file NIHMS966573-supplement-Supp_Figure_1.pdf]

**A**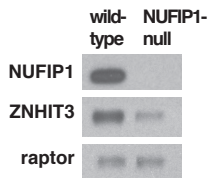**B**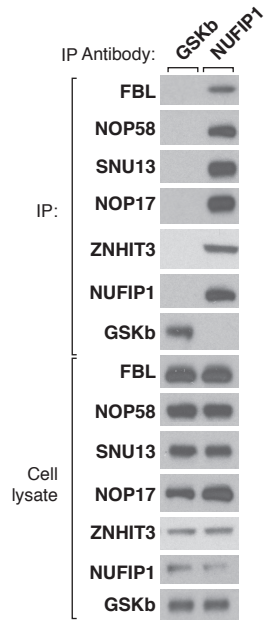**C**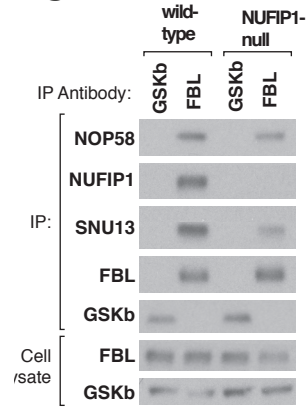**D**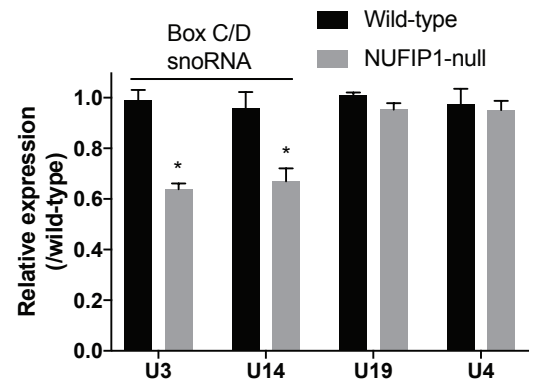**E**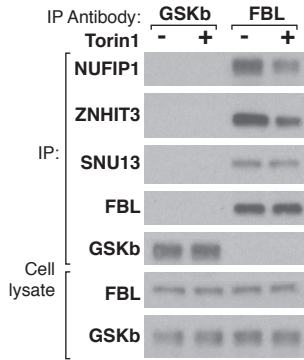

Supplement: NIHMS966573-supplement-Supp_Figure_2.pdf [file NIHMS966573-supplement-Supp_Figure_2.pdf]

**A**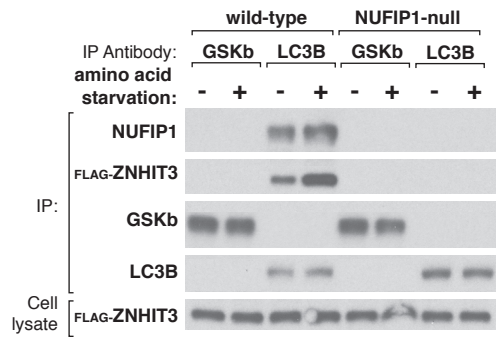**B**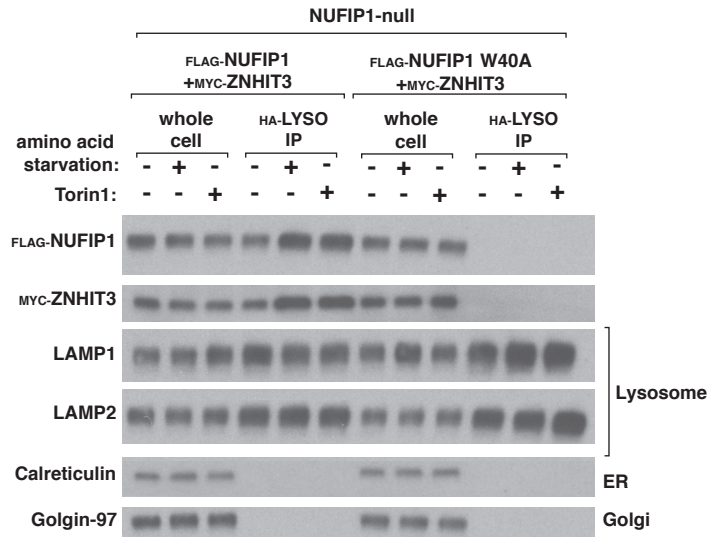**C**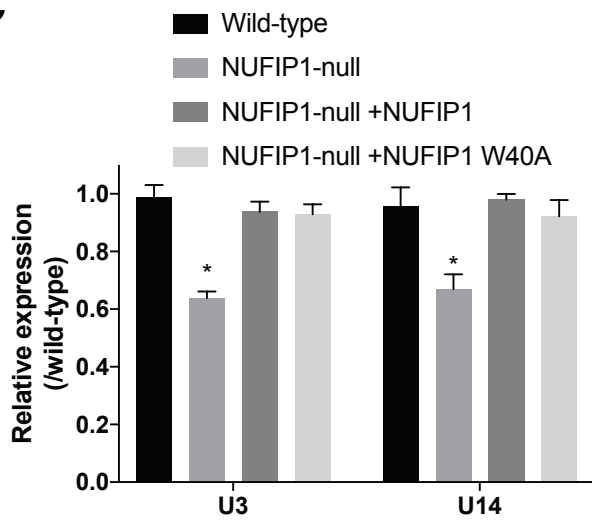**D**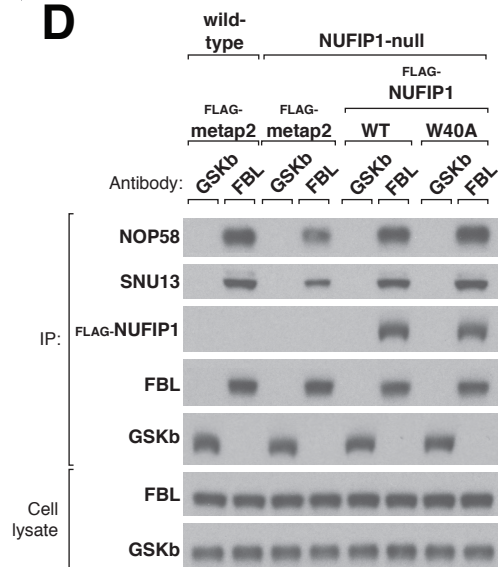

Supplement: NIHMS966573-supplement-Supp_Figure_3.pdf [file NIHMS966573-supplement-Supp_Figure_3.pdf]

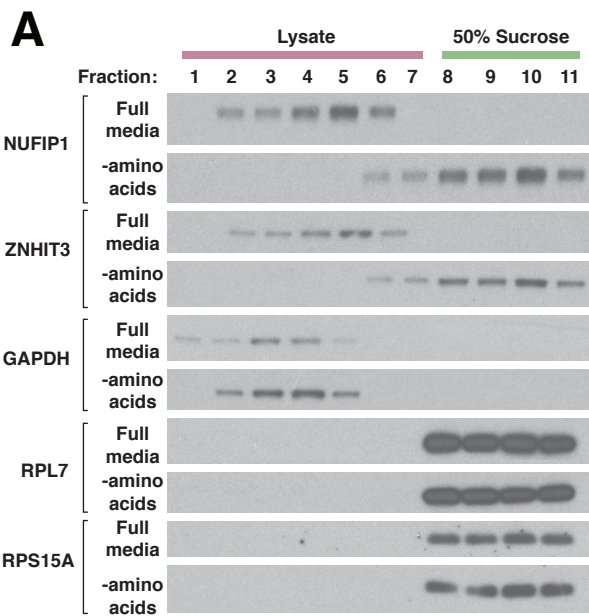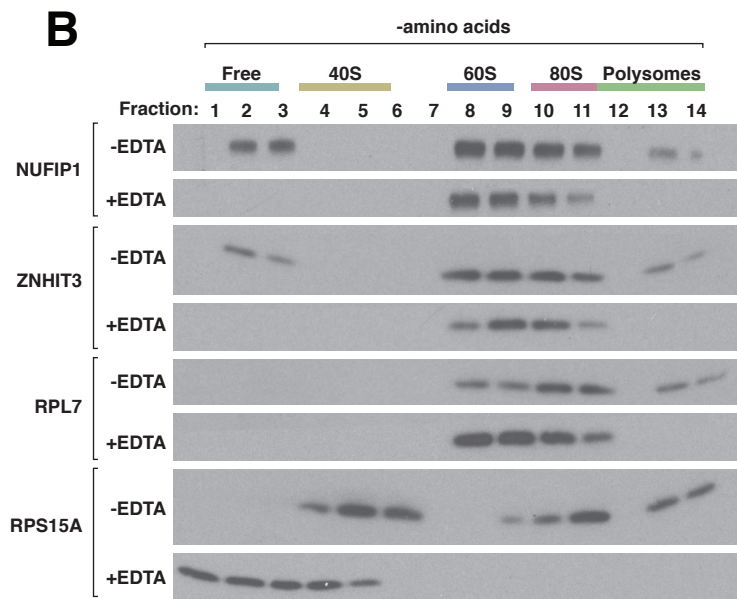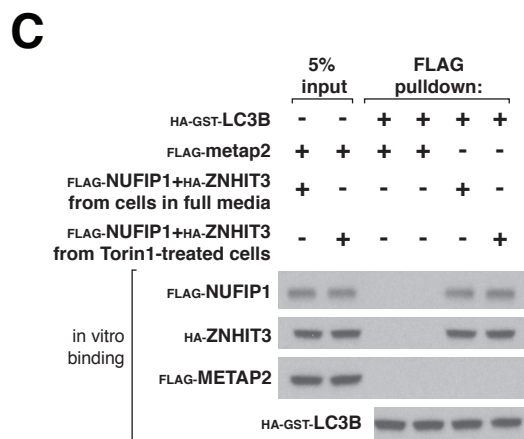

Supplement: NIHMS966573-supplement-Supp_Figure_4.pdf [file NIHMS966573-supplement-Supp_Figure_4.pdf]

**A**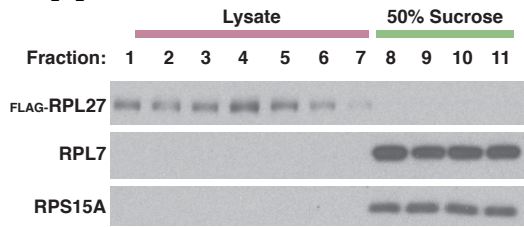**B**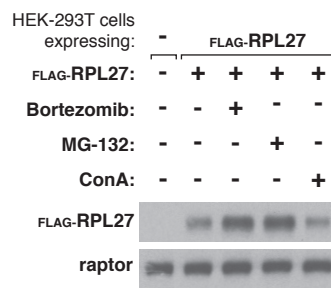**C**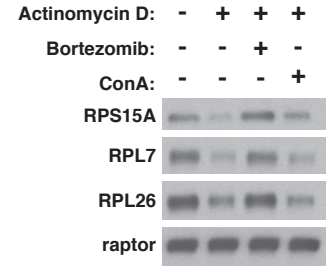

Supplement: NIHMS966573-supplement-Supp_Figure_5.pdf [file NIHMS966573-supplement-Supp_Figure_5.pdf]

**A**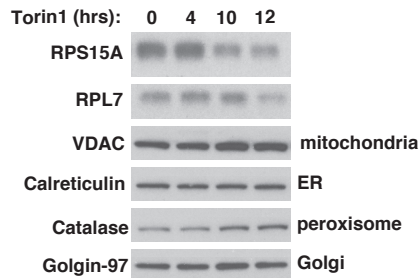**B**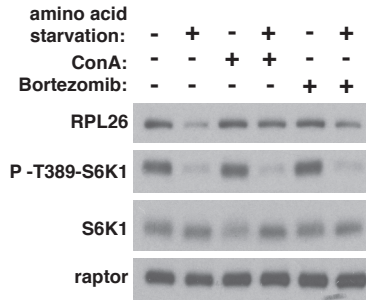**C**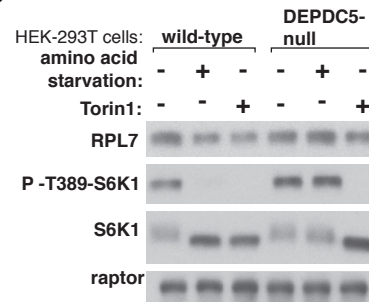**D**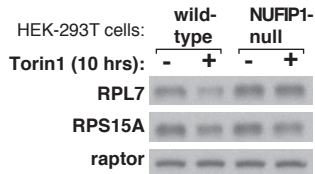**E**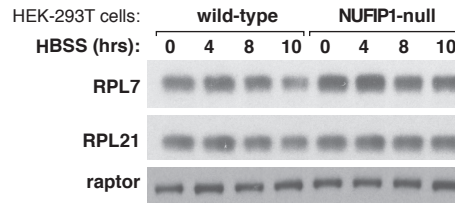**F**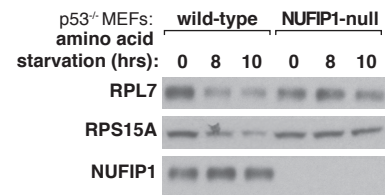**G**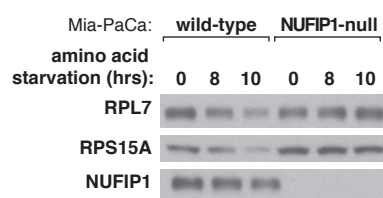**H**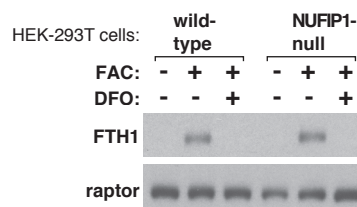**I**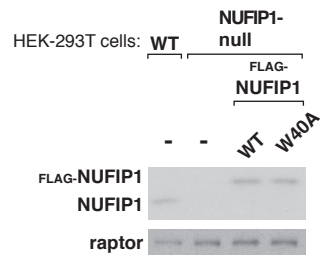**J**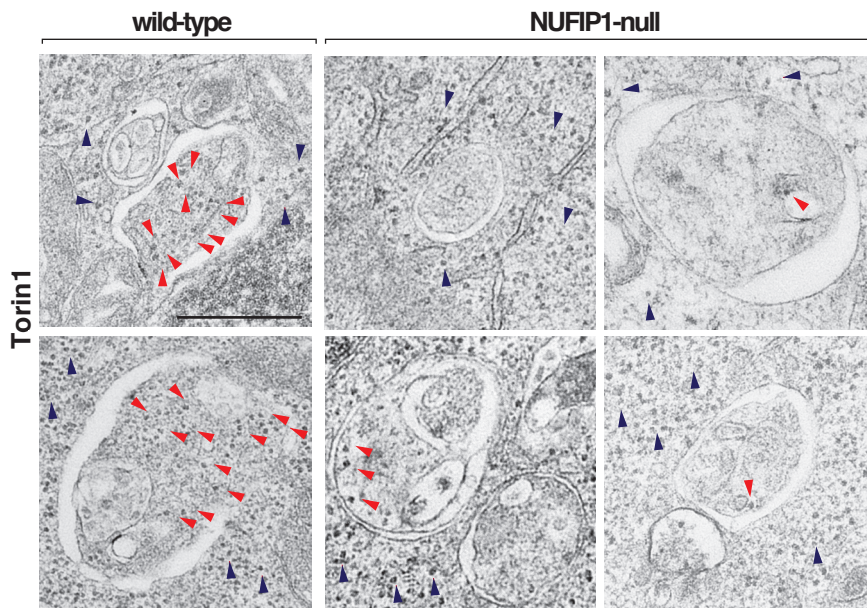**K**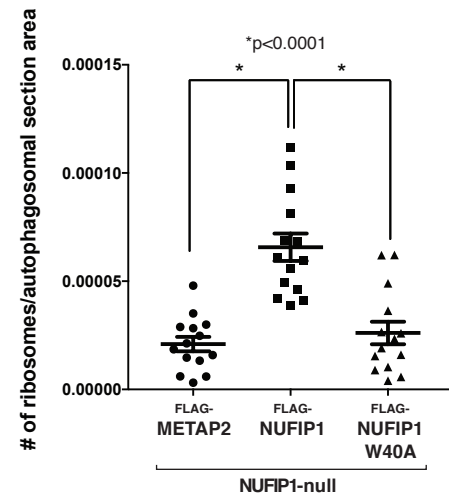**L**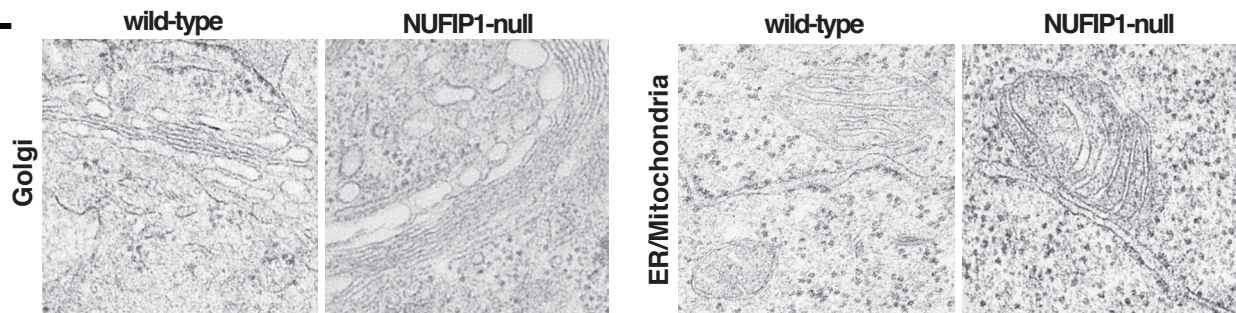

Supplement: NIHMS966573-supplement-Supp_Figure_6.pdf [file NIHMS966573-supplement-Supp_Figure_6.pdf]

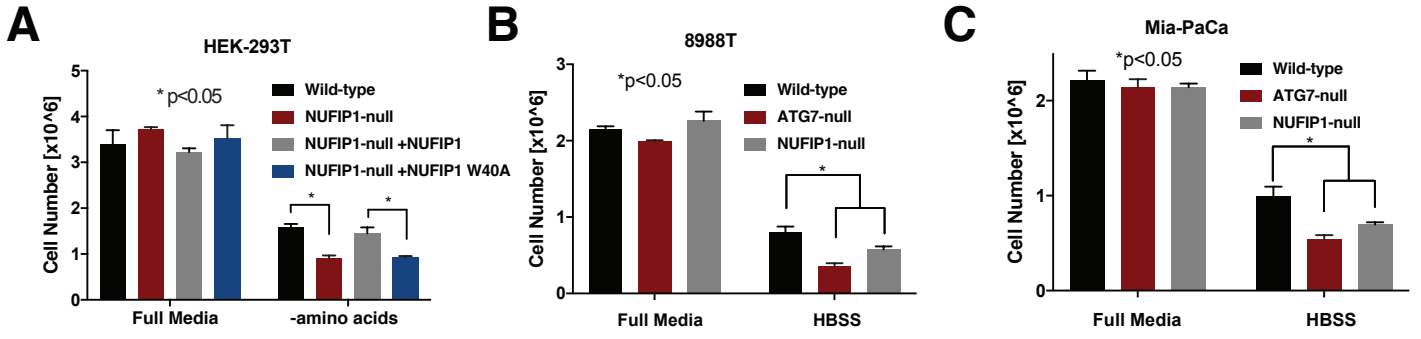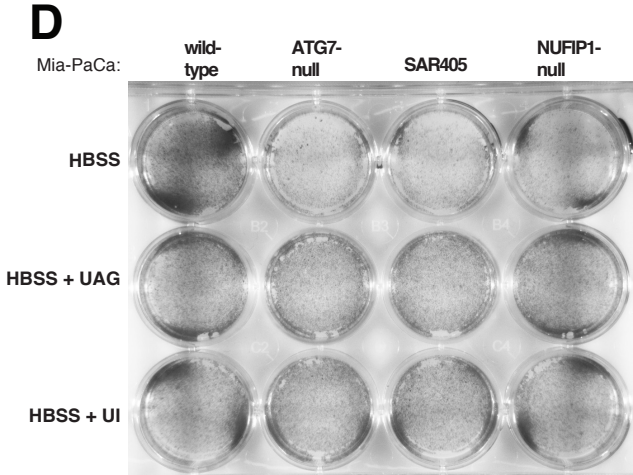

Supplement: NIHMS966573-supplement-Supp_Figure_8.pdf [file NIHMS966573-supplement-Supp_Figure_8.pdf]
